# Supplementary material
Source: publisher figshare collection journal article supplement (https://frontiersin.figshare.com/ndownloader/files/24765665)

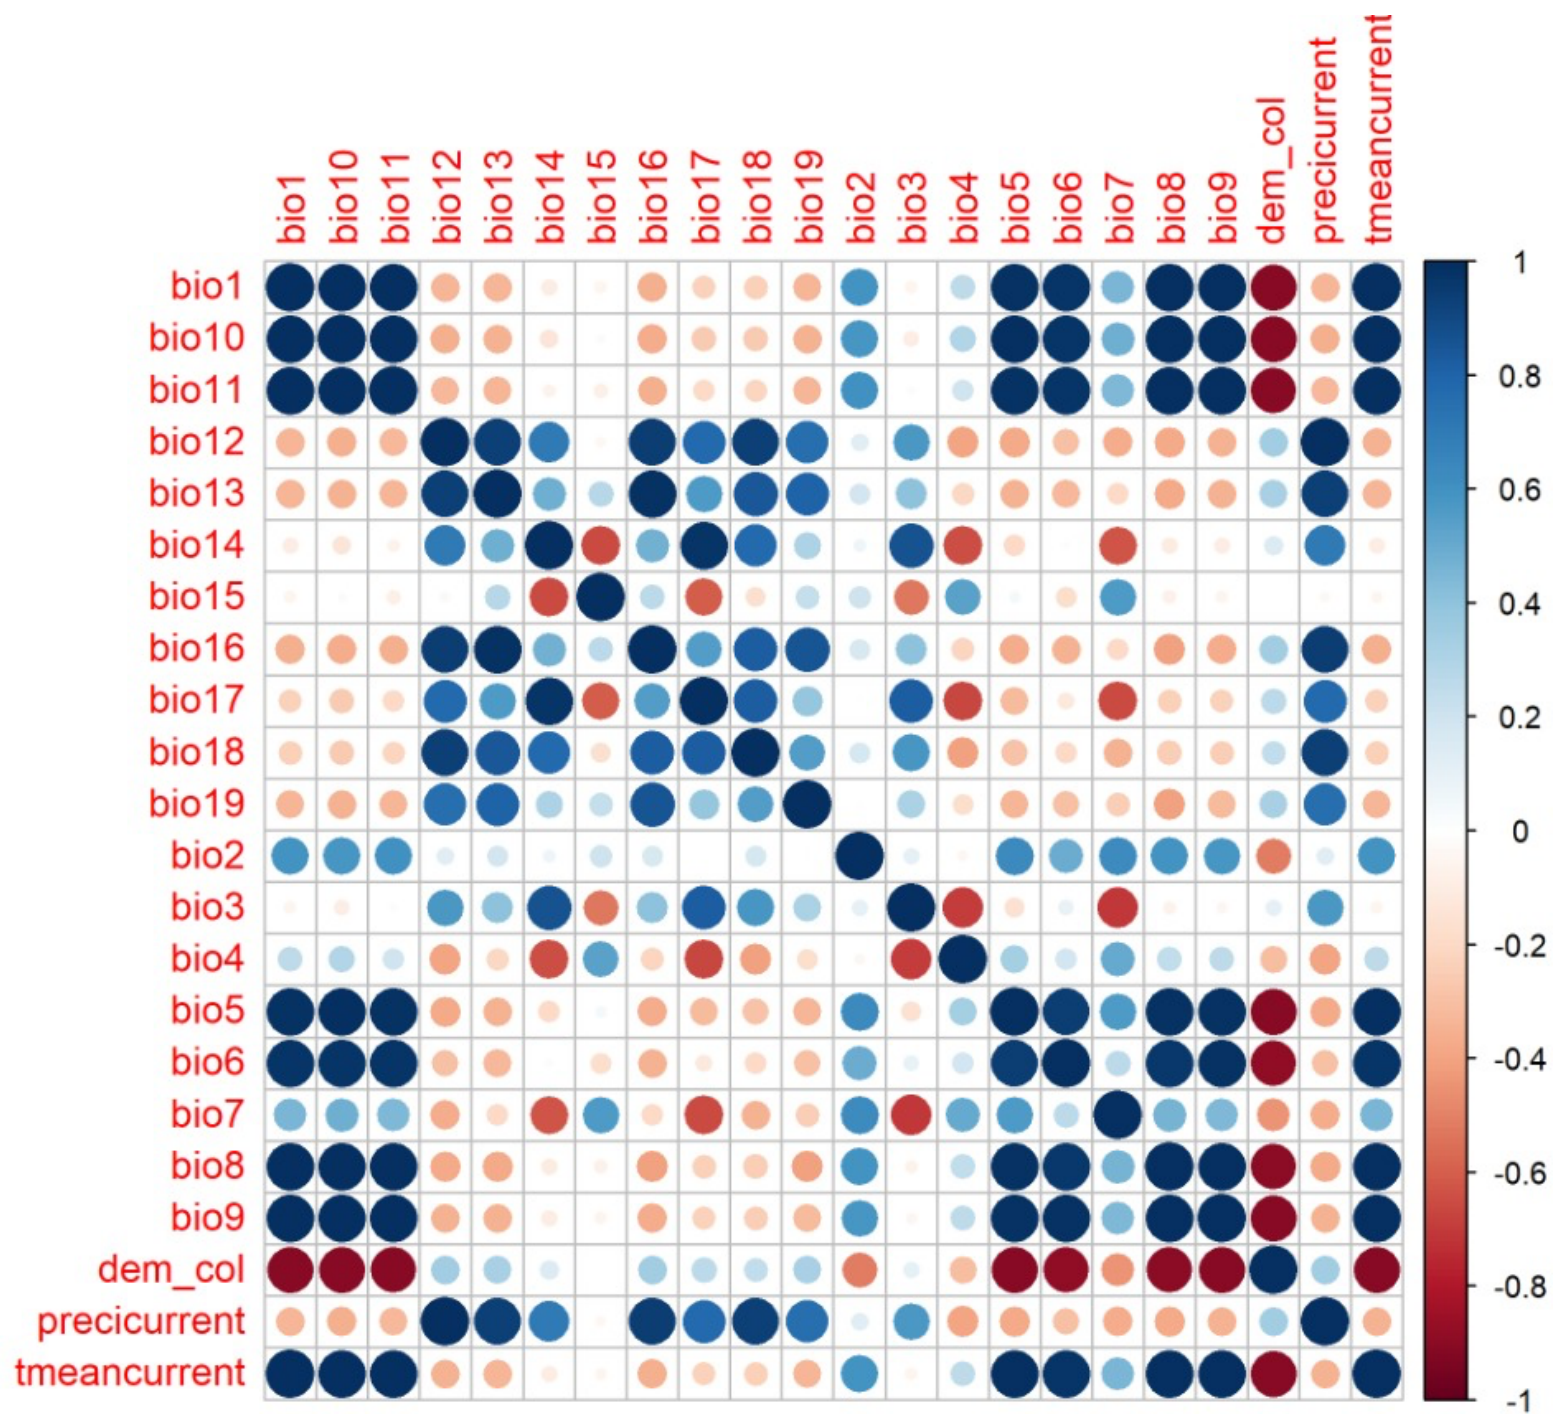

Supplement: Supplementary file 1 [file 24765665]
